# Supplementary material
Source: publisher figshare collection journal article supplement (https://rs.figshare.com/ndownloader/files/36567743)
Supplement: Supplementary file 1 [file 36567743]

**Supplementary material:**

**Preliminary evidence for one-trial social learning of vervet monkey alarm calling**

Adwait Deshpande, Bas Van Boekholt and Klaus Zuberbuhler

* Correspondence:

Adwait Deshpande Email: adwait.deshpande2390@gmail.com


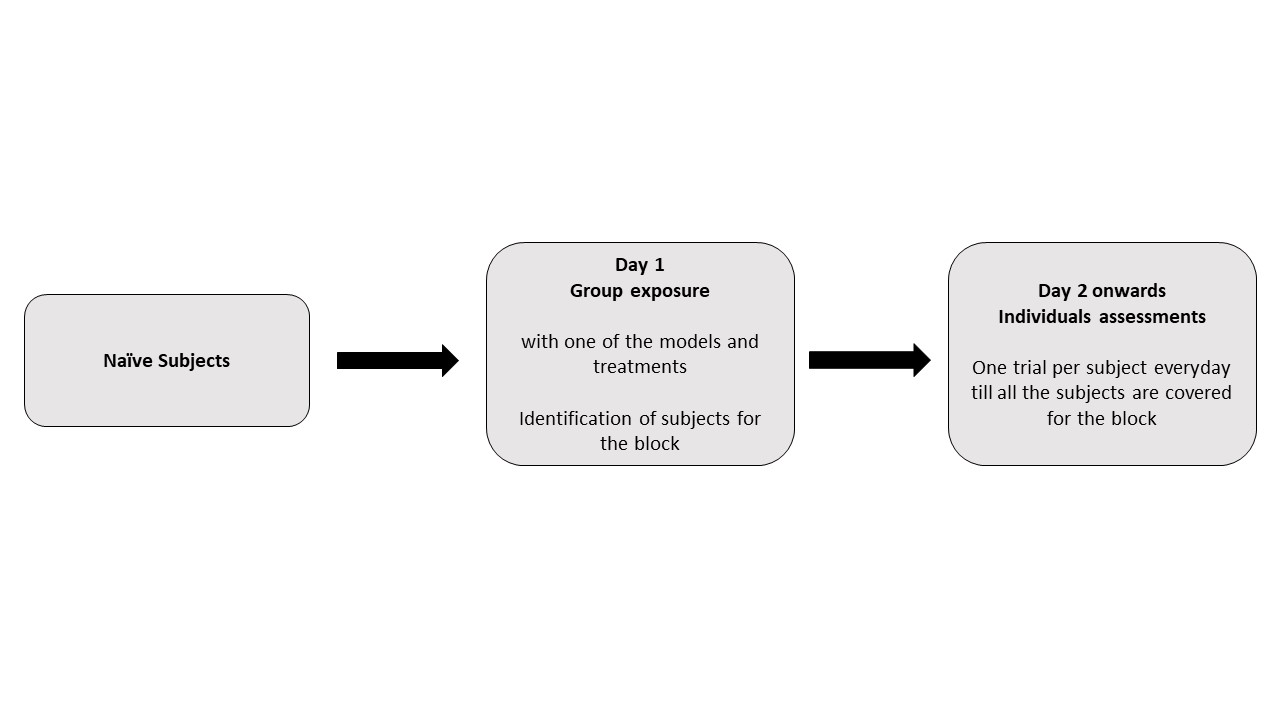


Figure S1: Design and timeline of the experimental blocks


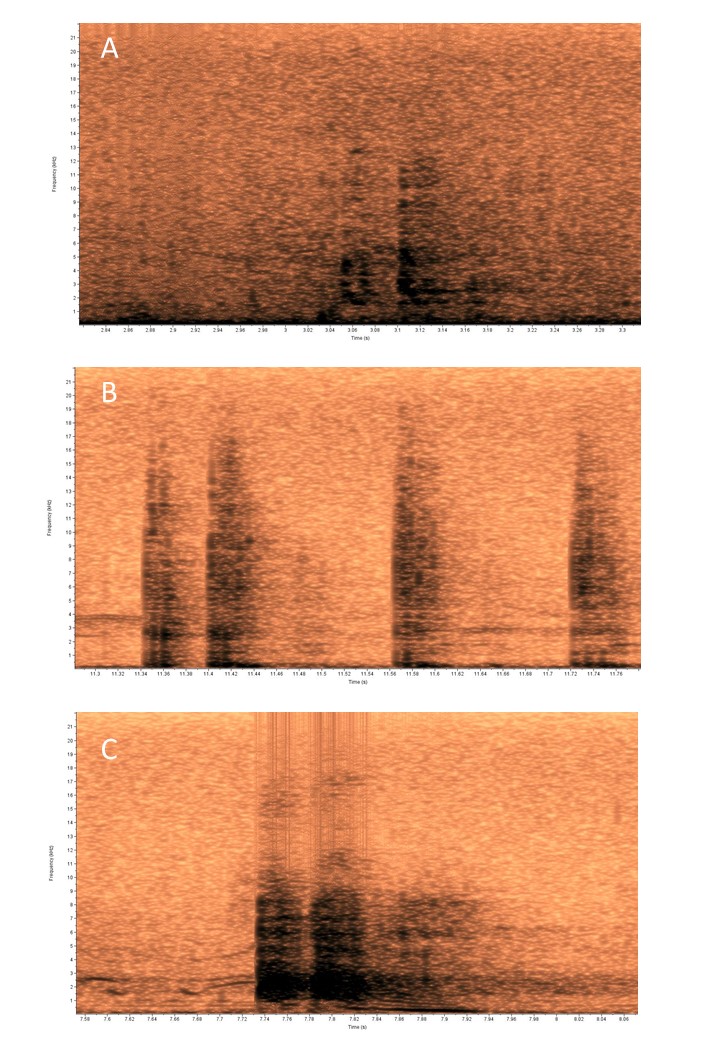


Figure S2: Spectrograms (Hamming window at 1024 DFT and 93.8% overlap) of different types of alarm calls elicited by the subjects (A) Eagle alarms (B) Snake alarms (C) Leopard alarms as described in the previous studies.


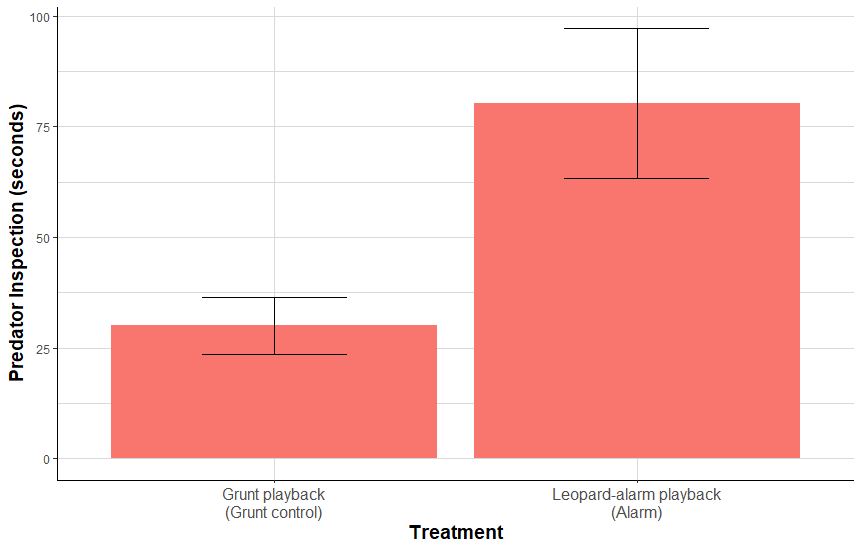


Figure S3: Mean (± SE) predator inspection of the subjects for the Grunt playback and leopard alarm playback (Alarm) treatment.

Figure S4: Mean (± SE) of snake alarms for the juvenile subjects exposed to caterpillar model


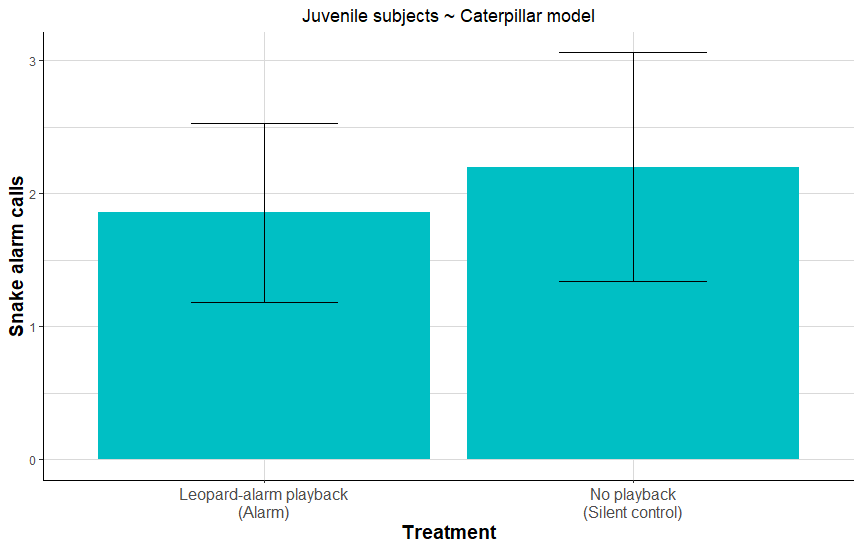


Table S1: List of acoustic parameters extracted from the alarm calls. Shaded parameters were used for the LDA classification

| **Acoustic parameter (unit)** | **Group Means from LDA Model (Scaled Data)** | | |
| --- | --- | --- | --- |
| Eagle | Leopard |  |
| Number of elements | -0.0350025 | -0.3522358 |  |
| Low Frequency (Hz) | 0.0736336 | -0.3854407 |  |
| High Frequency (Hz) | NA | NA |  |
| Delta Time (s) | -0.0970311 | 1.89210804 |  |
| Peak Frequency (Hz) | NA | NA |  |
| 1st Quartile Frequency (Hz) | -0.908022 | -0.755146 |  |
| 3rd Quartile Frequency (Hz) | -1.298510 | -1.112019 |  |
| Delta Frequency (Hz) | -0.4686237 | 0.1796256 |  |
| Average Entropy (bits) | -1.5461260 | -1.2993005 |  |
| Center Frequency (Hz) | -1.130832 | -0.958378 |  |
| Max Entropy (bits) | -1.458680 | -1.389708 |  |
| Average Power (dB) | -0.187820 | 1.892933 |  |
| Average Amplitude (U) | -0.07130897 | 0.34673157 |  |
| Max Amplitude (U) | NA | NA |  |
| Min Amplitude (U) | 0.3045821 | -1.5637610 |  |
| Min Entropy (bits) | -0.9943584 | -1.1550906 |  |
| Energy (dB) | NA | NA |  |
| Peak Amplitude (U) | NA | NA |  |
| Peak Power (dB) | NA | NA |  |
| Max Frequency (Hz) | -0.7533995 | -0.6241039 |  |
| Max Power (dB) | NA | NA |  |
| Peak Frequency Contour Max Frequency (Hz) | -1.0853231 | -0.8660863 |  |
| Peak Frequency Contour Average Slope (Hz/ms) | -0.038994987 | -0.008381332 |  |
